# Supplementary material for: The iBreastExam versus clinical breast examination for breast evaluation in high risk and symptomatic Nigerian women: a prospective study
Source: PubMed Central journal article supplement — Lancet Glob Health. Author manuscript; Available in PMC 2022 May 13. (PMC9102465; doi:10.1016/s2214-109x(22)00030-4), 2022-04
Supplement: NIHMS1791936-supplement-Supp_Materials.pdf [file NIHMS1791936-supplement-Supp_Materials.pdf]

# THE LANCET

## Global Health

### Supplementary appendix

This appendix formed part of the original submission and has been peer reviewed. We post it as supplied by the authors.

Supplement to: Mango VL, Olasehinde O, Omisore AD, et al. The iBreastExam versus clinical breast examination for breast evaluation in high risk and symptomatic Nigerian women: a prospective study. *Lancet Glob Health* 2022; **10**: e555–63.

**Appendix**

**Table 1: Breast Imaging-Reporting and Data System (BI-RADS) assessment categories [26]**

| BI-RADS Category | Description                                                                        |
|------------------|------------------------------------------------------------------------------------|
| 0                | Incomplete- need additional imaging evaluation and/or prior studies for comparison |
| 1                | Negative                                                                           |
| 2                | Benign                                                                             |
| 3                | Probably benign                                                                    |
| 4                | Suspicious                                                                         |
| 5                | Highly suggestive of malignancy                                                    |
| 6                | Known Biopsy-Proven Malignancy                                                     |

**Table 2: 273 symptomatic women were included in this study and reported a variety of breast symptoms.**

| Breast Symptom    | Number of women (%) |
|-------------------|---------------------|
| lump              | 88/273 (32%)        |
| pain/discomfort   | 181/273 (66%)       |
| nipple discharge  | 51/273 (19%)        |
| axillary swelling | 9/273 (3%)          |
| itching           | 8/273 (3%)          |
| tingling          | 1/273 (0.4%)        |
| skin changes      | 1/273 (0.4%)        |

**Table 3: Positive exam rates for clinical breast exam and iBreast Exam.**

|                            | Clinical breast exam | iBreast Exam  |
|----------------------------|----------------------|---------------|
| Overall positive studies   | 84/424 (20%)         | 226/424 (53%) |
| Symptomatic women positive | 75/273 (28%)         | 160/273 (59%) |
| High risk women positive   | 9/151 (6%)           | 66/151 (44%)  |

**Table 4: The joint use of iBreast Exam and clinical breast exam considered positive if either exam was positive.**

| Combined use of iBreast Exam and clinical breast exam | (95% CI)        |
|-------------------------------------------------------|-----------------|
| Sensitivity for suspicious masses                     | 92% (77.4–98.3) |
| Specificity for suspicious masses                     | 49% (44.0–54.1) |
| Accuracy for suspicious masses                        | 53% (47.7–57.6) |

**Table 5: Sensitivity of clinical breast exam and iBreast Exam for smaller breast lesions ( $\leq 2$  cm) compared with larger breast lesions ( $> 2$  cm).**

|                                  | lesions $> 2$ cm | lesions $\leq 2$ cm | p value |
|----------------------------------|------------------|---------------------|---------|
| Clinical breast exam sensitivity | 26%              | 8%                  | 0.021   |
| iBreast Exam sensitivity         | 42%              | 29%                 | 0.093   |

**Table 6: iBE and CBE sensitivities and specificities for detection of suspicious breast findings in dense vs. non-dense breasts. Note breast density was available for 399 women.**

|                 | Dense Breasts                   | Non-Dense Breasts               | p value |
|-----------------|---------------------------------|---------------------------------|---------|
| iBE sensitivity | 80% (59.3%, 93.2%)<br>(20/25)   | 100% (69.2%, 100%)<br>(10/10)   | 0.30    |
| iBE specificity | 40% (33.5%, 46.8%)<br>(88/220)  | 63% (54.8%, 71.1%)<br>(91/144)  | <0.0010 |
| CBE sensitivity | 80% (59.3%, 93.2%)<br>(20/25)   | 100% (69.2%, 100%)<br>(10/10)   | 0.30    |
| CBE specificity | 83% (77.1%, 87.5%)<br>(182/220) | 92% (86.7%, 96.1%)<br>(133/144) | 0.013   |

**Table 7: Patient age ( $\leq 50$  years or  $> 50$  years) did not significantly affect sensitivity or specificity of suspicious breast lesions with clinical breast examination or iBreast Exam.**

|                      | p value |
|----------------------|---------|
| Clinical breast exam | 0.34    |
| iBreast Exam         | 0.79    |

**Table 8: Percentage of false-positive iBE evaluations (false positive iBE/total negative patients as defined by imaging) before (n=192) and after (n=232) the iBE device upgrade.**

|                | Any Finding    | Suspicious Findings |
|----------------|----------------|---------------------|
| Before Upgrade | 49%<br>37/75   | 61%<br>109/179      |
| After Upgrade  | 35%<br>39/111  | 41%<br>83/204       |
|                | p = 0.053      | p < 0.0010          |
| Overall        | 41 %<br>76/186 | 50%<br>192/383      |
